# Supplementary material for: Sustainable Control of Onchocerciasis: Ocular Pathology in Onchocerciasis Patients Treated Annually with Ivermectin for 23 Years: A Cohort Study
Source: PubMed Central journal article supplement (PMC4041847; doi:10.1371/journal.pone.0098411), 2014-06-02
Supplement: pone.0098411.s001.pdf [file pone.0098411.s001.pdf]

*First 68 sample  
to 180 sample*

IVERMECTIN (MK-933)  
VS PLACEBO IN ONCHOCERCIASIS  
OPHTHALMOLOGIC EXAMINATION

*Hautshäute*

OE<sub>1</sub>

|     |           |                     |                      |
|-----|-----------|---------------------|----------------------|
| IIN | STUDY NO. | PROTOCOL NO.<br>519 | ALLOCATION NO.<br>B3 |
|-----|-----------|---------------------|----------------------|

PRE RETREAT. (MO.18)  
 DAY 3  
 MONTH 24  
 DATE EXAMINED 12/11/89  
(day/mo/yr)

MONTH 30  
 MONTH 36  
 MONTH 42  
 MONTH 48  
 MONTH 54

VISUAL ACUITY (6 metres; 20 feet; test with distance spectacle correction if normally used)

|                                                          |                   |            |            |
|----------------------------------------------------------|-------------------|------------|------------|
|                                                          |                   | RE         | LE         |
| <input checked="" type="checkbox"/> Snellen/Illiterate E | Uncorrected       | <u>574</u> | <u>574</u> |
| <input type="checkbox"/> Other _____                     | Corrected/Pinhole | _____      | _____      |

PERIPHERAL VISUAL FIELDS (Confrontation method)

|                         |                                     |   |                                     |
|-------------------------|-------------------------------------|---|-------------------------------------|
| Normal . . . . .        | <input checked="" type="checkbox"/> | 1 | <input checked="" type="checkbox"/> |
| 20° - 10° . . . . .     | <input type="checkbox"/>            | 2 | <input type="checkbox"/>            |
| Less than 10° . . . . . | <input type="checkbox"/>            | 3 | <input type="checkbox"/>            |
| Absent . . . . .        | <input type="checkbox"/>            | 4 | <input type="checkbox"/>            |

Other Abnormality  None, or describe below: \_\_\_\_\_

PUPILLARY REFLEX (Circle N = normal or A = abnormal)

|  |          |          |          |          |
|--|----------|----------|----------|----------|
|  | (1)      | (2)      | (1)      | (2)      |
|  | <u>N</u> | <u>A</u> | <u>N</u> | <u>A</u> |

If abnormal, describe below:  
Slightly slow

EXTERNAL EXAMINATION (Circle N = normal or A = abnormal)

|                           |          |          |          |          |
|---------------------------|----------|----------|----------|----------|
| Eyelids . . . . .         | <u>N</u> | <u>A</u> | <u>N</u> | <u>A</u> |
| Conjunctiva . . . . .     | <u>N</u> | <u>A</u> | <u>N</u> | <u>A</u> |
| Eyelid eversion . . . . . | <u>N</u> | <u>A</u> | <u>N</u> | <u>A</u> |
| Iris, Pupil . . . . .     | <u>N</u> | <u>A</u> | <u>N</u> | <u>A</u> |
| Ocular Movement . . . . . | <u>N</u> | <u>A</u> | <u>N</u> | <u>A</u> |

Other Abnormality  None, or describe, draw, photograph below or on Form OE5.  
mild pupillary conjunctivitis

**IVERMECTIN (MK-933)  
VS PLACEBO IN ONCHOCERCIASIS  
OPHTHALMOLOGIC EXAMINATION**

**OE<sub>2</sub>**

|     |           |                               |  |                             |
|-----|-----------|-------------------------------|--|-----------------------------|
| IIN | STUDY NO. | PROTOCOL NO.<br><b>519-19</b> |  | ALLOCATION NO.<br><b>#3</b> |
|-----|-----------|-------------------------------|--|-----------------------------|

PRE RETREAT. (MO.18)   
  DAY 3   
  MONTH 24   
 DATE EXAMINED 11/89  
 (day/mo/yr)

MONTH 30   
  MONTH 36   
  MONTH 42   
  MONTH 48

MONTH 54

**SLIT LAMP EXAMINATION**

ANTERIOR CHAMBER (after head dependent for 5 minutes)

|                                 | RE | LE |
|---------------------------------|----|----|
| Microfilariae (count) . . . . . | 0  | 0  |
| Flare —————                     | 0  | 0  |
| Cells —————                     | 0  | 0  |

|           |              |
|-----------|--------------|
| Grade as: | 0 = Absent   |
|           | 1 = Mild     |
|           | 2 = Moderate |
|           | 3 = Severe   |

Other Abnormality  None, or describe below:

\_\_\_\_\_

\_\_\_\_\_

**CORNEA**

Microfilariae counts

|                   |   |   |
|-------------------|---|---|
| a) live . . . . . | 0 | 0 |
| b) dead . . . . . | 0 | 0 |

c) locations .

Punctate Opacities

|                     |   |   |
|---------------------|---|---|
| a) counts . . . . . | 3 | 0 |
|---------------------|---|---|

b) locations

Limbitis

|                                    | RE                                  |                                     | LE                       |                                     |
|------------------------------------|-------------------------------------|-------------------------------------|--------------------------|-------------------------------------|
|                                    | YES                                 | NO                                  | YES                      | NO                                  |
| Limbal vessel dilation . . . . .   | <input checked="" type="checkbox"/> | <input type="checkbox"/>            | <input type="checkbox"/> | <input checked="" type="checkbox"/> |
| Limbal edema . . . . .             | <input type="checkbox"/>            | <input checked="" type="checkbox"/> | <input type="checkbox"/> | <input checked="" type="checkbox"/> |
| White globular opacities . . . . . | <input type="checkbox"/>            | <input checked="" type="checkbox"/> | <input type="checkbox"/> | <input checked="" type="checkbox"/> |

|           |              |
|-----------|--------------|
| Grade as: | 0 = Absent   |
|           | 1 = Mild     |
|           | 2 = Moderate |
|           | 3 = Severe   |

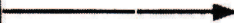

\_\_\_\_\_



**IVERMECTIN (MK-933)  
VS PLACEBO IN ONCHOCERCIASIS  
OPHTHALMOLOGIC EXAMINATION**

**OE<sub>3</sub>**

|     |           |                               |  |                             |
|-----|-----------|-------------------------------|--|-----------------------------|
| IIN | STUDY NO. | PROTOCOL NO.<br><b>519-19</b> |  | ALLOCATION NO.<br><b>H3</b> |
|-----|-----------|-------------------------------|--|-----------------------------|

PRE RETREAT. (MO.18)   
  DAY 3   
  MONTH 24   
 DATE EXAMINED 11/88  
 (day/mo/yr)

MONTH 30   
  MONTH 36   
  MONTH 42   
  MONTH 48  
 MONTH 54

**SLIT LAMP EXAMINATION (cont'd)**

**CORNEA (cont'd)**

|                                                                     | RE                                  | LE                                  |
|---------------------------------------------------------------------|-------------------------------------|-------------------------------------|
| Sclerosing Keratitis                                                |                                     |                                     |
| Absent. . . . .                                                     | <input checked="" type="checkbox"/> | <input checked="" type="checkbox"/> |
| Limbal Haze . . . . .                                               | <input type="checkbox"/>            | <input type="checkbox"/>            |
| Nasal or Temporal . . . . .                                         | <input type="checkbox"/>            | <input type="checkbox"/>            |
| Confluent Inferiorly. . . . .                                       | <input type="checkbox"/>            | <input type="checkbox"/>            |
| Pupil Covered. . . . .                                              | <input type="checkbox"/>            | <input type="checkbox"/>            |
| Other Abnormality <input type="checkbox"/> None, or describe below: |                                     |                                     |

**LENS**

|                                                  | YES<br>(1)               | NO<br>(2)                           | YES<br>(1)               | NO<br>(2)                           |
|--------------------------------------------------|--------------------------|-------------------------------------|--------------------------|-------------------------------------|
| Opacity . . . . .                                | <input type="checkbox"/> | <input checked="" type="checkbox"/> | <input type="checkbox"/> | <input checked="" type="checkbox"/> |
| Describe abnormality and/or location of opacity: |                          |                                     |                          |                                     |

**ANTERIOR VITREUM**

|                                                                     | YES                      | NO                                  | YES                      | NO                                  |
|---------------------------------------------------------------------|--------------------------|-------------------------------------|--------------------------|-------------------------------------|
| Syneresis . . . . .                                                 | <input type="checkbox"/> | <input checked="" type="checkbox"/> | <input type="checkbox"/> | <input checked="" type="checkbox"/> |
| Opacities . . . . .                                                 | <input type="checkbox"/> | <input checked="" type="checkbox"/> | <input type="checkbox"/> | <input checked="" type="checkbox"/> |
| Other Abnormality <input type="checkbox"/> None, or describe below: |                          |                                     |                          |                                     |

**IRIS (Circle N = normal or A = abnormal)**    N    A    N    A

If abnormal, describe below:

**INTRAOCULAR PRESSURE (mmHg)**

(Goldman Applanation Tonometer)

|                |             |             |
|----------------|-------------|-------------|
| First Reading  | <u>15.6</u> | <u>15.6</u> |
| Second Reading | _____       | _____       |
| Third Reading  | _____       | _____       |

IVERMECTIN (MK-933)  
VS PLACEBO IN ONCHOCERCIASIS  
OPHTHALMOLOGIC EXAMINATION

OE<sub>4</sub>

|     |           |                       |                      |
|-----|-----------|-----------------------|----------------------|
| IIN | STUDY NO. | PROTOCOL NO.<br>51949 | ALLOCATION NO.<br>43 |
|-----|-----------|-----------------------|----------------------|

PRE RETREAT. (MO. 18)  
 DAY 3  
 MONTH 24  
 DATE EXAMINED 11/18/89  
 (day/mo/yr)

MONTH 30  
 MONTH 36  
 MONTH 42  
 MONTH 48

MONTH 54

OPHTHALMOSCOPY

DILATED FUNDUS EXAMINATION\*

Optic Disc (circle N = normal or A = abnormal)

|  |     |     |     |
|--|-----|-----|-----|
|  | RE  |     | LE  |
|  | (1) | (2) | (1) |
|  | N   | A   | N   |
|  |     |     | (2) |
|  |     |     | A   |

If abnormal, describe below:

\_\_\_\_\_

\_\_\_\_\_

\_\_\_\_\_

Cup/Disc Ratio

|  |     |    |     |    |
|--|-----|----|-----|----|
|  | YES | NO | YES | NO |
|--|-----|----|-----|----|

Posterior Vitreous Detachment

|                          |                          |                          |                          |
|--------------------------|--------------------------|--------------------------|--------------------------|
| <input type="checkbox"/> | <input type="checkbox"/> | <input type="checkbox"/> | <input type="checkbox"/> |
|--------------------------|--------------------------|--------------------------|--------------------------|

Macula (circle N = normal or A = abnormal)

|  |   |   |   |   |
|--|---|---|---|---|
|  | N | A | N | A |
|--|---|---|---|---|

If abnormal, describe below:

\_\_\_\_\_

\_\_\_\_\_

Peripheral Retina

Retinitis

Grade as: 0 = None  
1 = Mild  
2 = Severe  
3 = Active

|  |     |    |     |    |
|--|-----|----|-----|----|
|  | YES | NO | YES | NO |
|--|-----|----|-----|----|

Hemorrhage

|                          |                                     |                          |                          |
|--------------------------|-------------------------------------|--------------------------|--------------------------|
| <input type="checkbox"/> | <input checked="" type="checkbox"/> | <input type="checkbox"/> | <input type="checkbox"/> |
|--------------------------|-------------------------------------|--------------------------|--------------------------|

Retinal Holes

|                          |                                     |                          |                                     |
|--------------------------|-------------------------------------|--------------------------|-------------------------------------|
| <input type="checkbox"/> | <input checked="" type="checkbox"/> | <input type="checkbox"/> | <input checked="" type="checkbox"/> |
|--------------------------|-------------------------------------|--------------------------|-------------------------------------|

Lattice Degeneration

|                          |                                     |                          |                                     |
|--------------------------|-------------------------------------|--------------------------|-------------------------------------|
| <input type="checkbox"/> | <input checked="" type="checkbox"/> | <input type="checkbox"/> | <input checked="" type="checkbox"/> |
|--------------------------|-------------------------------------|--------------------------|-------------------------------------|

Paving Stone Degeneration

|                          |                                     |                          |                                     |
|--------------------------|-------------------------------------|--------------------------|-------------------------------------|
| <input type="checkbox"/> | <input checked="" type="checkbox"/> | <input type="checkbox"/> | <input checked="" type="checkbox"/> |
|--------------------------|-------------------------------------|--------------------------|-------------------------------------|

Other Abnormality  None, or describe:

\_\_\_\_\_

\_\_\_\_\_

\*Note: All abnormal signs must be located on the accompanying diagrams:

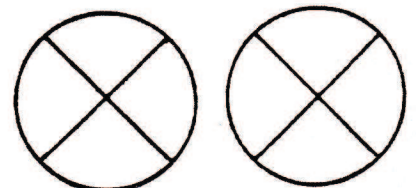



**IVERMECTIN (MK-933)  
VS PLACEBO IN ONCHOCERCIASIS  
OPHTHALMOLOGIC EXAMINATION**

**OE<sub>5</sub>**

|            |                  |                               |  |                       |
|------------|------------------|-------------------------------|--|-----------------------|
| <b>IIN</b> | <b>STUDY NO.</b> | <b>PROTOCOL NO.</b><br>519-19 |  | <b>ALLOCATION NO.</b> |
|------------|------------------|-------------------------------|--|-----------------------|

PRE RETREAT. (MO.18)  
  DAY 3  
  MONTH 24  
 DATE EXAMINED \_\_\_\_\_  
(day/mo/yr)

MONTH 30  
  MONTH 36  
  MONTH 42  
  MONTH 48  
  MONTH 54

**FUNDUS PHOTOGRAPHY (Optional)**

|                                               |           |          |                   |
|-----------------------------------------------|-----------|----------|-------------------|
|                                               | <b>RE</b> |          | <b>LE</b>         |
| (Circle N = normal or A = abnormal) . . . . . | <b>N</b>  | <b>A</b> | <b>N</b> <b>A</b> |
| If abnormal, describe below:                  |           |          |                   |
|                                               |           |          |                   |
|                                               |           |          |                   |

**FLUORESCEIN ANGIOGRAPHY (Optional)**

|                                               |          |          |                   |
|-----------------------------------------------|----------|----------|-------------------|
|                                               | <b>N</b> | <b>A</b> | <b>N</b> <b>A</b> |
| (Circle N = normal or A = abnormal) . . . . . |          |          |                   |
| If abnormal, describe below:                  |          |          |                   |
|                                               |          |          |                   |
|                                               |          |          |                   |

|                                                                                                                       |                                                    |
|-----------------------------------------------------------------------------------------------------------------------|----------------------------------------------------|
| <b>WORK SHEET</b><br><small>CLINICAL RESEARCH INTERNATIONAL<br/>MERCK SHARP &amp; DOHME RESEARCH LABORATORIES</small> | <small>Investigator's Name</small><br><b>SHEET</b> |
|-----------------------------------------------------------------------------------------------------------------------|----------------------------------------------------|

IVERMECTIN (MIR-500)  
VS PLACEBO IN ONCHOCERIASIS  
POST TREATMENT OPHTHALMOLOGIC EXAMINATION

OE 6

3

STUDY NO. 519

OPHTHALMOLOGIC EXAMINATIONS — CHANGES POST TREATMENT

11/11/89

DAY 3 — 4       MONTH 3       MONTH 6

**NOTE TO THE INVESTIGATOR:** Please review the data you have provided on Forms OE1 — OE 5. Was there a significant change from the Previous Examination? Check 'NO' or 'YES' below, and if 'YES', describe change.

| OPHTHALMOLOGIC EXAMINATION    | SIGNIFICANT CHANGE? |                    |
|-------------------------------|---------------------|--------------------|
|                               | NO                  | YES (and describe) |
| VISUAL ACUITY                 |                     | 5/5      5/5       |
| PERIPHERAL VISUAL FIELDS      | ✓                   |                    |
| PUPILLARY REFLEX              | ✓                   |                    |
| EXTERNAL EXAMINATION          | ✓                   |                    |
| SLIT LAMP:                    |                     |                    |
| ANTERIOR CHAMBER              | ✓                   |                    |
| CORNEA                        | ✓                   |                    |
| LENS                          |                     |                    |
| ANTERIOR VITREUM              |                     |                    |
| IRIS                          | ✓                   |                    |
| INTRAOCULAR PRESSURE          |                     |                    |
| OPHTHALMOSCOPE:               |                     |                    |
| OPTIC DISC                    |                     |                    |
| CUP/DISC RATIO                |                     |                    |
| POSTERIOR VITREOUS DETACHMENT |                     |                    |
| MACULA                        |                     |                    |
| PERIPHERAL RETINA             |                     |                    |
| FUNDUS PHOTOGRAPHY            |                     |                    |
| FLUORESCEIN ANGIOGRAPHY       |                     |                    |

COMMENTS:

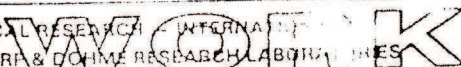
Investigator's Name  
**SHEET**
